# Supplementary material for: Multifunctional hierarchical mesoporous silica and black phosphorus nanohybrids as chemo-photothermal synergistic agents for enhanced cancer therapy
Source: Royal Society of Chemistry journal article supplement (doi:10.1039/d0nr02044c), 2020-01-01
Supplement: d0nr02044c1.pdf [file d0nr02044c1.pdf]

# Multifunctional hierarchical mesoporous silica and black phosphorus nanohybrids as chemo-photothermal synergistic agents for enhanced cancer therapy

Xiaoning Ren<sup>a†</sup>, Lisi Shi<sup>a†</sup>, Xiaofeng Yu<sup>a</sup>, Wenliang Liu<sup>a</sup>, Jianyong Sheng<sup>a</sup>, Jiangling Wan<sup>a</sup>, Yu Li<sup>b</sup>, Ying Wan<sup>a\*</sup>, Zhiqiang Luo<sup>a\*</sup>, Xiangliang Yang<sup>a</sup>

<sup>a</sup> National Engineering Research Center for Nanomedicine, College of Life Science and Technology, Huazhong University of Science and Technology, 430074, Wuhan, Hubei, China

<sup>b</sup> Laboratory of Living Materials at the State Key Laboratory of Advanced Technology for Materials Synthesis and Processing, Wuhan University of Technology, 430070, Wuhan, Hubei, China

† The authors equally contribute to this work.

\* To whom correspondence should be addressed.

Email: zhiqiangluo@hust.edu.cn, [ying\\_wan@hust.edu.cn](mailto:ying_wan@hust.edu.cn)

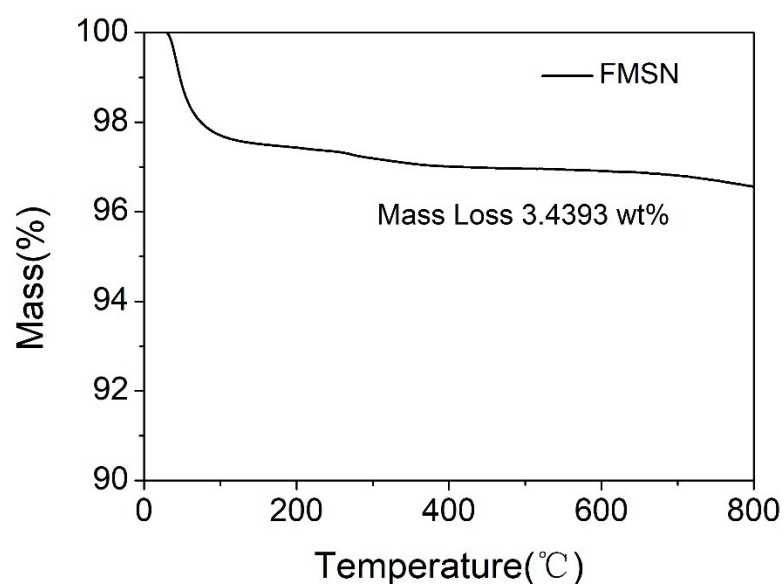

**Figure S1.** TG analysis of the as prepared FMSN.

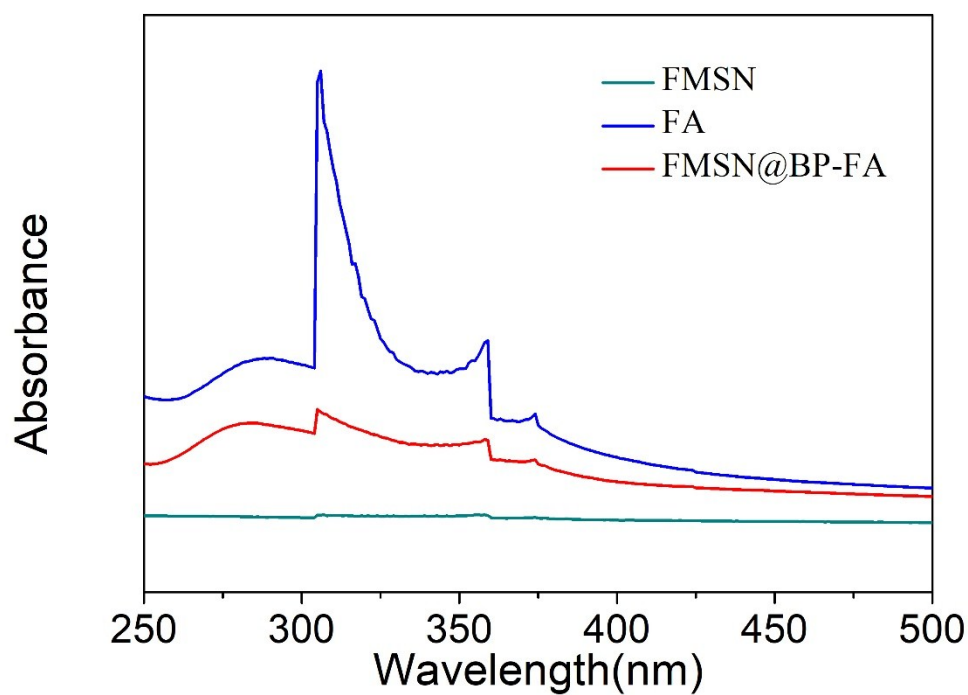

**Figure S2.** UV-vis absorption spectra of the as fabricated FMSN, FA and FMSN@BP-FA.

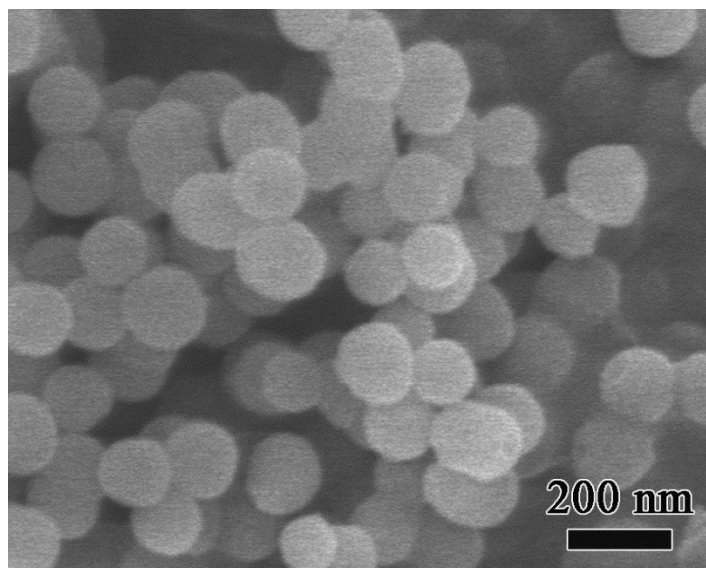

**Figure S3.** SEM image of the as prepared MSN.

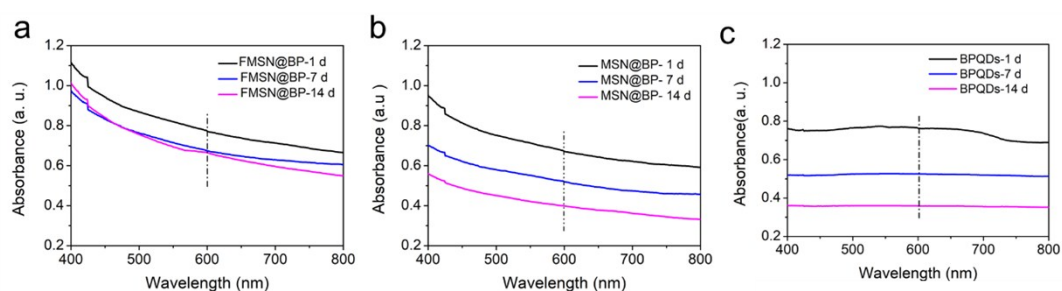

**Figure S4.** Comparison of the degradation of the as-fabricated FMSN@BP, MSN@BP and BPQDs.

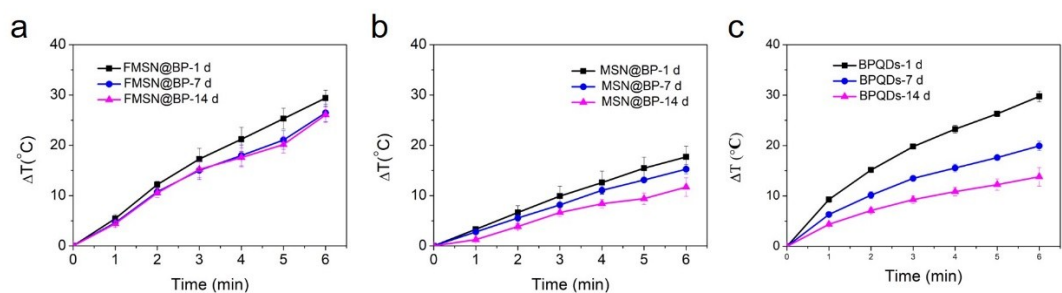

**Figure S5.** Photothermal stability of the as-fabricated FMSN@BP, MSN@BP and BPQDs.
